# Supplementary material for: High-throughput analysis of the satellitome revealed enormous diversity of satellite DNAs in the neo-Y chromosome of the cricket Eneoptera surinamensis
Source: PubMed Central journal article supplement (PMC5527012; doi:10.1038/s41598-017-06822-8), 2017-07-25
Supplement: 41598_2017_6822_MOESM1_ESM.pdf [file 41598_2017_6822_MOESM1_ESM.pdf]

**High-throughput analysis of the satellitome revealed enormous diversity of satellite DNAs in the neo-Y chromosome of the cricket *Eneoptera surinamensis***

Octavio Manuel Palacios-Gimenez<sup>1</sup>, Guilherme B Dias<sup>2</sup>, Leonardo Gomes de Lima<sup>2</sup>, Gustavo CS Kuhn<sup>2</sup>, Erica Ramos<sup>3</sup>, Cesar Martins<sup>3</sup>, Diogo Cavalcanti Cabral-de-Mello<sup>1,\*</sup>

<sup>1</sup>UNESP - Univ Estadual Paulista, Instituto de Biociências/IB, Departamento de Biologia, Rio Claro, São Paulo, Brazil

<sup>2</sup>Departamento de Biologia Geral, Universidade Federal de Minas Gerais, Belo Horizonte, MG, Brazil

<sup>3</sup>UNESP - Univ Estadual Paulista, Instituto de Biociências/IB, Departamento de Morfologia, Botucatu, São Paulo, Brazil

**Supplementary table S1.** Table showing the main characteristics of the satDNAs families < 60 bp observed in the *E. surinamensis* genome.

| Cluster | Consensus                         | Monomer size (bp) | AT%  | Genome proportion % | Nucleotide divergence ( $\pm$ sd) % | Reads/contigs | Chromosomal position (loci number)                                               |
|---------|-----------------------------------|-------------------|------|---------------------|-------------------------------------|---------------|----------------------------------------------------------------------------------|
| Esur 1  | TGGAGGAGGA                        | 10                | 40   | 1.43                | 1.9 ( $\pm$ 0.8)                    | 27.09         | 1 (2)<br>2 (1/2*)<br>3 (1)<br>X <sub>1</sub> (2)<br>X <sub>2</sub> (3)<br>Y (11) |
| Esur 5  | TCTCGAGACGG<br>GGGCGACGC          | 20                | 25   | 1.01                | 6.6 ( $\pm$ 2.2)                    | 878.66        | 1 (2)<br>2 (1)<br>3 (1)<br>X <sub>1</sub> (2)<br>X <sub>2</sub> (3)<br>Y (s)     |
| Esur 12 | GGGACGAGAC                        | 10                | 30   | 0.486               | 22.7 ( $\pm$ 5.2)                   | 300.95        | 1 (1)<br>2 (1)<br>3 (1)<br>X <sub>1</sub> (1)<br>X <sub>2</sub> (2)<br>Y (6)     |
| Esur 13 | TTGAGACAGGC<br>TTCCGAGAGAC<br>ACC | 25                | 44   | 0.48                | 12.7 ( $\pm$ 1.9)                   | 346.66        | 1 (2)<br>2 (1)<br>3 (1)<br>X <sub>1</sub> (3)<br>X <sub>2</sub> (3)<br>Y (s)     |
| Esur 16 | GAAGAAGTGC<br>AAGAGATAC           | 20                | 65   | 0.472               | 20.4 ( $\pm$ 4.9)                   | 153.45        | 1 (1)<br>2 (1)<br>3 (1)<br>X <sub>1</sub> (1)<br>X <sub>2</sub> (3)<br>Y (5)     |
| Esur 21 | CCCTCAAGCCGT                      | 31                | 35.5 | 0.326               | 10.6 ( $\pm$ 1.4)                   | 248.82        | 1 (1/2*)                                                                         |

|         |                                                     |    |      |       |             |        |                                                                              |
|---------|-----------------------------------------------------|----|------|-------|-------------|--------|------------------------------------------------------------------------------|
|         | CGCAACGTCCA<br>CCTCTCAC                             |    |      |       |             |        | 2 (1/2*)<br>3 (1)<br>X <sub>1</sub> (3)<br>X <sub>2</sub> (3)<br>Y (s)       |
| Esur 25 | GGCA                                                | 4  | 25   | 0.278 | 14.1 (±7.4) | 116.71 | 1 (1)<br>2 (1)<br>3 (1)<br>X <sub>1</sub> (3)<br>X <sub>2</sub> (3)<br>Y (s) |
| Esur 30 | GGGAGGAGACG<br>CGGGCGCGC                            | 20 | 15   | 0.254 | 30.2 (±4)   | 68.875 | 1 (1)<br>2 (1)<br>3 (1)<br>X <sub>1</sub> (4)<br>X <sub>2</sub> (3)<br>Y (s) |
| Esur 40 | ACTACGCATGG<br>GAGTACACCTG<br>CGGGCAGCGGC<br>TCACTC | 39 | 35.9 | 0.199 | 8.8 (±1.1)  | 286.66 | 1 (3)<br>2 (1)<br>3 (1)<br>X <sub>1</sub> (3)<br>X <sub>2</sub> (3)<br>Y (s) |
| Esur 49 | CTCCACCTCCTT<br>ACTCCGCCTACT<br>ACCG                | 28 | 39.3 | 0.162 | 14.6 (±2.9) | 123.88 | 1 (1)<br>2 (1)<br>3 (1)<br>X <sub>1</sub> (3)<br>X <sub>2</sub> (3)<br>Y (s) |
| Esur 56 | GAGTAAAGGGA<br>A GAAGAGGTG                          | 21 | 52.4 | 0.142 | 14 (±1.5)   | 41.91  | 1 (3)<br>2 (1)<br>3 (1)<br>X <sub>1</sub> (3)<br>X <sub>2</sub> (3)<br>Y (s) |
| Esur 68 | TAGGCAGG                                            | 8  | 37.5 | 0.107 | 14.1 (±2.9) | 20.41  | 2 (1)                                                                        |



|          |                                                                      |    |      |       |             |       |                    |
|----------|----------------------------------------------------------------------|----|------|-------|-------------|-------|--------------------|
|          |                                                                      |    |      |       |             |       | 3 (1)              |
|          |                                                                      |    |      |       |             |       | X <sub>1</sub> (1) |
|          |                                                                      |    |      |       |             |       | X <sub>2</sub> (1) |
|          |                                                                      |    |      |       |             |       | Y (s)              |
| Esur 114 | GGAGAGGTGGA<br>GGC                                                   | 14 | 28.6 | 0.057 | 15.1 (±1.8) | 20.72 | 1 (2)              |
|          |                                                                      |    |      |       |             |       | 2 (1)              |
|          |                                                                      |    |      |       |             |       | 3 (1)              |
|          |                                                                      |    |      |       |             |       | X <sub>1</sub> (1) |
|          |                                                                      |    |      |       |             |       | X <sub>2</sub> (3) |
|          |                                                                      |    |      |       |             |       | Y (3)              |
| Esur 115 | AAAGAGAAGAG<br>GGCGGA                                                | 17 | 47.1 | 0.057 | 17.5 (±2.3) | 186.5 | 1 (1)              |
|          |                                                                      |    |      |       |             |       | 2 (1)              |
|          |                                                                      |    |      |       |             |       | 3 (1)              |
|          |                                                                      |    |      |       |             |       | X <sub>1</sub> (1) |
|          |                                                                      |    |      |       |             |       | X <sub>2</sub> (1) |
|          |                                                                      |    |      |       |             |       | Y (4)              |
| Esur 124 | GACGGAGACGG<br>GGAGACGACGG<br>CGCGG                                  | 27 | 22.2 | 0.053 | 23.8 (±2.6) | 24.78 | 1 (2)              |
|          |                                                                      |    |      |       |             |       | 2 (1)              |
|          |                                                                      |    |      |       |             |       | 3 (1)              |
|          |                                                                      |    |      |       |             |       | X <sub>1</sub> (4) |
|          |                                                                      |    |      |       |             |       | X <sub>2</sub> (2) |
|          |                                                                      |    |      |       |             |       | Y (4)              |
| Esur 127 | TTTTAGGGTAGG<br>TTAGG                                                | 17 | 58.8 | 0.051 | 28.4 (±1.9) | 22.06 | X <sub>1</sub> (1) |
|          |                                                                      |    |      |       |             |       | X <sub>2</sub> (1) |
|          |                                                                      |    |      |       |             |       | Y (7)              |
| Esur 130 | GACGGAGAGAT<br>GTA                                                   | 14 | 50   | 0.051 | 5.4 (±1.5)  | 164.5 | X <sub>1</sub> (1) |
|          |                                                                      |    |      |       |             |       | X <sub>2</sub> (2) |
|          |                                                                      |    |      |       |             |       | Y (5)              |
| Esur 131 | GGCGACAGGGG<br>AAACGGCTTCG<br>AGAGACGACGC<br>GGTGGACACAG<br>TGGCGAGA | 52 | 34.6 | 0.050 | 11.8 (±1.5) | 81.75 | 1 (1)              |
|          |                                                                      |    |      |       |             |       | 2 (1/2*)           |
|          |                                                                      |    |      |       |             |       | 3 (1)              |
|          |                                                                      |    |      |       |             |       | X <sub>1</sub> (3) |
|          |                                                                      |    |      |       |             |       | X <sub>2</sub> (2) |
|          |                                                                      |    |      |       |             |       | Y (3)              |

(±se)= standard error; \*Heteromorphisms.

**Supplementary table S2.** Table showing the main characteristics of the satDNA families > 60 bp observed in the *E. surinamensis* genome.

| Repeat Family | Monomer Size | AT%   | Genome Proportion % | Nucleotide Divergence % ( $\pm$ SE) | Reads/Contigs | Chromosomal position (Loci Number)                                     |
|---------------|--------------|-------|---------------------|-------------------------------------|---------------|------------------------------------------------------------------------|
| Esur2         | 137          | 29.2  | 1.42                | 10.94 ( $\pm$ 1.19)                 | 195.64        | 1 (1)<br>2 (1)<br>X <sub>2</sub> (1)<br>Y (9)                          |
| Esur3         | 142          | 33.1  | 1.19                | 8.7 ( $\pm$ 1.15)                   | 233.08        | 2 (1)<br>X <sub>1</sub> (1)<br>X <sub>2</sub> (2)<br>Y (7)             |
| Esur4         | 144          | 35.42 | 1.04                | 11.6 ( $\pm$ 1.6)                   | 497.62        | 1 (1)                                                                  |
| Esur6         | 83           | 36.15 | 0.707               | 15.7 ( $\pm$ 2.1)                   | 540.35        | 1 (1)                                                                  |
| Esur11        | 147          | 38.1  | 0.507               | 5.39 ( $\pm$ 0.92)                  | 329.4         | Y (9)                                                                  |
| Esur17        |              |       | 0.466               | 9.4 ( $\pm$ 1.3)                    | 183.27        | $\alpha\beta$ 1 (1)                                                    |
| $\alpha$      | 163          | 56.5  |                     |                                     |               | $\alpha\beta$ X <sub>2</sub> (2)                                       |
| $\alpha\beta$ | 317          | 42    |                     |                                     |               |                                                                        |
| Esur18        |              |       |                     |                                     |               | $\alpha\beta$ 1 (1)                                                    |
| $\alpha\beta$ | 517          | 38.3  | 0.432               | 4.3 ( $\pm$ 0.6)                    | 623.55        | $\alpha$ Y (3)                                                         |
| Esur24        | 140          | 67.15 | 0.289               | 13.9 ( $\pm$ 2)                     | 626.33        | 1 (2)<br>2 (1)<br>3 (0/1*)<br>X <sub>1</sub> (1)<br>X <sub>2</sub> (1) |
| Esur31        | 229          | 46.29 | 0.254               | 14.9 ( $\pm$ 1.5)                   | 183.22        | 1 (1)<br>Y (3)                                                         |
| Esur34        | 140          | 35    | 0.240               | 4.07(0.87)                          | 259.33        | 1 (1)<br>2 (1)<br>X <sub>1</sub> (1)<br>X <sub>2</sub> (1)<br>Y (11)   |
| Esur37        | 234          | 32.9  | 0.211               | 9.91 ( $\pm$ 1.66)                  | 273.8         | Y (3)                                                                  |
| Esur46        | 181          | 36.5  | 0.178               | 2.21 ( $\pm$ 1.05)                  | 770.66        | Y (2)                                                                  |
| Esur58        | 141          | 29.8  | 0.132               | 13 ( $\pm$ 1.3)                     | 55.22         | 2 (1)<br>X <sub>1</sub> (2)<br>X <sub>2</sub> (2)<br>Y (5)             |
| Esur65        | 155          | 51    | 0.11                | 6.5 ( $\pm$ 1)                      | 129.64        | Y (4)                                                                  |

|         |     |       |       |                    |        |                                                   |
|---------|-----|-------|-------|--------------------|--------|---------------------------------------------------|
| Esur66  | 253 | 33.2  | 0.109 | 3.2 (1.1)          | 117.83 | Y (7)                                             |
| Esur67  | 60  | 40    | 0.108 | 19.7 ( $\pm 2.1$ ) | 52.15  | 2 (1)<br>Y (1)                                    |
| Esur82  | 109 | 44.04 | 0.09  | 6.56 ( $\pm 1$ )   | 167.43 | 1 (1)<br>X <sub>1</sub> (1)<br>X <sub>2</sub> (2) |
| Esur87  | 82  | 39    | 0.087 | 3.7 ( $\pm 0.8$ )  | 375.33 | Y (2)                                             |
| Esur88  | 127 | 44.1  | 0.086 | 7.8 ( $\pm 1.2$ )  | 79.57  | 1 (1)<br>Y (2)                                    |
| Esur96  | 196 | 20.9  | 0.079 | 10 ( $\pm 0.8$ )   | 24.97  | X <sub>2</sub> (1)                                |
| Esur128 | 221 | 49.8  | 0.051 | 7.9 ( $\pm 1.3$ )  | 47.28  | Y (2)                                             |

( $\pm$ SE)= standard error; \*Heteromorphism.

**Supplementary table S3.** Results of quantitative PCR and statistical analysis for differences of satDNAs copies between males and females. The GDR *p*-value < 0.01 for each satDNAs copy number differences between males and females using chi-squared test.

| Target-to-reference gene dose ratio (GDR) |      |                           |                            |                             |                               |                       |
|-------------------------------------------|------|---------------------------|----------------------------|-----------------------------|-------------------------------|-----------------------|
| Target                                    | Sex* | GDR Sample I <sup>§</sup> | GDR Sample II <sup>§</sup> | GDR Sample III <sup>§</sup> | GRD mean ±SD                  | GDR ratio male/female |
| Esur2                                     | M    | 4,589,943.414             | 5,336,423.279              | 12,461,705.5                | 7,462,690.73 ± 4,345,333.074  | 21,157.1555           |
|                                           | F    | 238.4433767               | 572.4829607                | 247.2533517                 | 352.726563 ± 190.3655947      |                       |
| Esur3                                     | M    | 3,218,553.361             | 12,538,601.29              | 6,864,680.147               | 7,540,611.598 ± 4,696,646.232 | 3.37525053            |
|                                           | F    | 1,192,916.688             | 2,932,143.585              | 2,577,208.069               | 2,234,089.447 ± 918,980.5994  |                       |
| Esur11                                    | M    | 1,940,446.966             | 7,657,517.862              | 4,982,863.902               | 4,860,276.243 ± 2,860,506.198 | 9,366.49006           |
|                                           | F    | 522.4952048               | 409.2146383                | 624.9916148                 | 518.900486 ± 107.9333933      |                       |
| Esur18 α                                  | M    | 12,732,367.57             | 7,245,655.812              | 5,406,957.028               | 8,461,660.135 ± 3,811,090.365 | 37.5797056            |
|                                           | F    | 318,970.1693              | 302,083.9154               | 54,442.96862                | 225,165.6845 ± 148,091.0891   |                       |
| Esur31 α                                  | M    | 23,329.9919               | 105,843.3597               | 66,168.62816                | 65,113.99324 ± 41,266.79241   | 1.58958397            |
|                                           | F    | 12,825.7723               | 35,343.5533                | 74,719.41985                | 40,962.91515 ± 31,327.12598   |                       |
| Esur34                                    | M    | 103,929.5917              | 360,856.871                | 389,427.5245                | 284,737.9957 ± 157,234.9509   | 0.9492957             |
|                                           | F    | 139,544.5605              | 450,235.4622               | 310,059.7103                | 299,946.5777 ± 155,592.1453   |                       |
| Esur37                                    | M    | 65,916.2504               | 371,403.6136               | 94,695.46835                | 177,338.4441 ± 168,680.2548   | 254.764641            |
|                                           | F    | 538.1566036               | 683.0776572                | 867.0277901                 | 696.0873503 ± 164.8211255     |                       |
| Esur46                                    | M    | 289,780.2839              | 1,513,856.053              | 2,267,163.923               | 1,356,933.42 ± 997,988.0001   | 10,341.8971           |
|                                           | F    | 195.8544264               | 95.78146359                | 101.9863084                 | 131.2073995 ± 56.07186099     |                       |
| Esur58                                    | M    | 170,329.8368              | 488,456.9772               | 216,031.8232                | 291,606.2124 ± 172,002.429    | 5.22063215            |
|                                           | F    | 46,642.28272              | 21,988.4678                | 98,938.73395                | 55,856.49482 ± 39,293.91993   |                       |
| Esur65                                    | M    | 2,514,030.864             | 11,295,314.88              | 7,181,601.336               | 6,996,982.359 ± 4,393,552.134 | 3,120.15107           |



|         |   |               |               |               |                               |             |
|---------|---|---------------|---------------|---------------|-------------------------------|-------------|
|         | F | 2,532.122283  | 2,447.950298  | 1,747.469315  | 2,242.513965 ± 430.7820045    |             |
| Esur66  | M | 28,457.96794  | 131,478.6404  | 234,376.5249  | 131,437.7111 ± 102,959.2846   | 7,510.13156 |
|         | F | 13.55926978   | 21.34783014   | 17.597058     | 17.50138598 ± 3.895161484     |             |
| Esur67  | M | 849,780.4416  | 3,608599.544  | 2,053,082.758 | 2,170,487.581 ± 1,383,151.702 | 2.80511074  |
|         | F | 284,756.551   | 1,016,353.83  | 1,020,175.071 | 773,761.8174 ± 423,495.2932   |             |
| Esur87  | M | 6,271,729.637 | 1,646,315.361 | 2,097,688.565 | 3,338,577.854 ± 2,550,189.989 | 2,419.44807 |
|         | F | 1,428.989547  | 2,030.419591  | 680.2678782   | 1,379.892339 ± 676.4135674    |             |
| Esur88  | M | 443,731.0493  | 2,364,118.033 | 4,120,315.191 | 2,309,388.091 ± 1,838,903.005 | 12.4890365  |
|         | F | 19,219.50737  | 173,706.6992  | 361,813.488   | 184,913.2315 ± 171,571.7012   |             |
| Esur128 | M | 385,671.1233  | 2,215,048.739 | 1,315,818.393 | 1,305,512.752 ± 914,732.3488  | 605.944893  |
|         | F | 934.7247035   | 3,409.778215  | 2,119.019259  | 2,154.507393 ± 1,237.908328   |             |

\*M, male; F, female.

§ Mean value (n=3) in three independent samples.

±SD, standard deviation.

**Supplementary table S4.** List of primers designed and used in this paper.

| Repeat family     | Oligo name                 | Sequences                          |
|-------------------|----------------------------|------------------------------------|
| Esur2*            | Esur_sat_CL_2_F            | 5'TGG GAC GGA GCA GCG CTG 3'       |
|                   | Esur_sat_CL_2_R            | 5'CCA CGC GCG CCC TAC TCA 3'       |
| Esur3*            | Esur_sat_CL_3_F            | 5'CCT GCA CCA TCA TAA GGA GA 3'    |
|                   | Esur_sat_CL_3_R            | 5'GCG GGC CAC CGT GCG CT 3'        |
| Esur4             | Esur_sat_CL_4_F            | 5'TGG CCG GTA GTG TCA AAA AG 3'    |
|                   | Esur_sat_CL_4_R            | 5'ACG TTA CAA CGC TAG CCG G 3'     |
| Esur6             | Esur_sat_CL_6_F            | 5'GAG GCG GCC GTC GGC CT 3'        |
|                   | Esur_sat_CL_6_R            | 5'GCT ATG ACA TCG CGA CAC CA 3'    |
| Esur11*           | Esur_sat_CL_11_F           | 5'GCA TTC ATT GGT TGC GGC GA 3'    |
|                   | Esur_sat_CL_11_R           | 5'TTC GTC TGA CGC CGC AGT A 3'     |
| Esur17 $\alpha$   | Esur_sat_CL_17 $\alpha$ _F | 5'GCC TCC GAA AAC CGT AAA AA 3'    |
|                   | Esur_sat_CL_17 $\alpha$ _R | 5'GTG CGC GCA TAT TTG TTC TA 3'    |
| Esur17 $\beta$    | Esur_sat_CL_17 $\beta$ _F  | 5'CCT GCG TGT ACG CAC ATT 3'       |
|                   | Esur_sat_CL_17 $\beta$ _R  | 5'CGT TCT TGT GGT CGC ACT TG 3'    |
| Esur18 $\alpha$ * | Esur_sat_CL_18 $\alpha$ _F | 5'GCA AGG GTA CCT GTG CAA AC 3'    |
|                   | Esur_sat_CL_18 $\alpha$ _R | 5'CTA TAT CCG GCA GGG TGG T 3'     |
| Esur18 $\beta$    | Esur_sat_CL_18 $\beta$ _F  | 5'GTG TTC CCC GGG TGA AAT AA 3'    |
|                   | Esur_sat_CL_18 $\beta$ _R  | 5'CCG AGC CGA AAT TTT TCT AA 3'    |
| Esur24            | Esur_sat_CL_24_F           | 5'TGT TTG AAG ATC ATG GAA CAA T 3' |
|                   | Esur_sat_CL_24_R           | 5'TAT GTA GGT TCA AGT ACT TTA C 3' |
| Esur31 $\alpha$ * | Esur_sat_CL_31_F           | 5'CCT TGC CGG ATA TAG GAA TA 3'    |
|                   | Esur_sat_CL_31_R           | 5'GGG TAC CCC CTA AAT AGG G 3'     |
| Esur34*           | Esur_sat_CL_34_F           | 5'GAG CAG GGA GAA GGA GTG AG 3'    |
|                   | Esur_sat_CL_34_R           | 5'CCG GTG CAT ACA CCC TCT 3'       |
| Esur37*           | Esur_sat_CL_37_F           | 5'TCA AGT CGT CGC TGC GCC T 3'     |
|                   | Esur_sat_CL_37_R           | 5'AGG GCG GCG GCG AGT CCT 3'       |
| Esur46*           | Esur_sat_CL_46_F           | 5'CAG CGT AGT TCG CTT GTC AG 3'    |
|                   | Esur_sat_CL_46_R           | 5'CCG TTC GCG GGG TAG TCG 3'       |
| Esur58*           | Esur_sat_CL_58_F           | 5'CTG CAC CAG CAT AAG GAG GA 3'    |
|                   | Esur_sat_CL_58_R           | 5'GGC GGG CCA CAG TGC CTC 3'       |
| Esur65*           | Esur_sat_CL_65_F           | 5'GCA CGA CTA CGC TTC CTT CT 3'    |
|                   | Esur_sat_CL_65_R           | 5'TGG CAA TCT GAG CGG TTG AG 3'    |
| Esur66*           | Esur_sat_CL_66_F           | 5'AGG GTG TGG GCG GTA GTA G 3'     |
|                   | Esur_sat_CL_66_R           | 5'CGT GCC ACC CGC TCC CT 3'        |
| Esur67*           | Esur_sat_CL_67_F           | 5'GGT AGT GTC GGT AGC GAT GT 3'    |
|                   | Esur_sat_CL_66_R           | 5'AGA GCC TCA GCC TCC ACC 3'       |
| Esur82            | Esur_sat_CL_82_F           | 5'GGT GTG AGG GAT TTG AGG AG 3'    |
|                   | Esur_sat_CL_82_R           | 5'CAT CTC ATC TCT CCC AGC C 3'     |
| Esur87*           | Esur_sat_CL_87_F           | 5'AGC GCT CCG ACT GTA ACT CTT 3'   |
|                   | Esur_sat_CL_87_R           | 5'GCT GAC TCA CCT AAT GCT GG 3'    |
| Esur88*           | Esur_sat_CL_88_F           | 5' TGC GAG AGC GCT GGA GGA GG 3'   |
|                   | Esur_sat_CL_88_R           | 5'ACC ACC ACC ACA ATT ACC AC 3'    |
| Esur96            | Esur_sat_CL_96_F           | 5'CAG CAG CTC GTA CCA CGC CA 3'    |
|                   | Esur_sat_CL_96_R           | 5'CTG CTG GAC GCT GCG GCG 3'       |
| Esur128*          | Esur_sat_CL_128_F          | 5'TGA CTC AGA GGA TAA CGG AG 3'    |
|                   | Esur_sat_CL_128_R          | 5'CTG CTC TCA CCA CTG TGT CC 3'    |

\*Clusters used in qPCR experiments to test difference in copy number between male and female.

**Supplementary Figure S1** contains a Schematic representation of the structurally complete copies and organization of the Esur17- $\alpha/\beta$  (a) and Esur18- $\alpha/\beta$  (b) satDNAs found in the *E. surinamensis* genome sequence. The form, size, type of arrays, orientation and consensus sequences are indicated by colors.

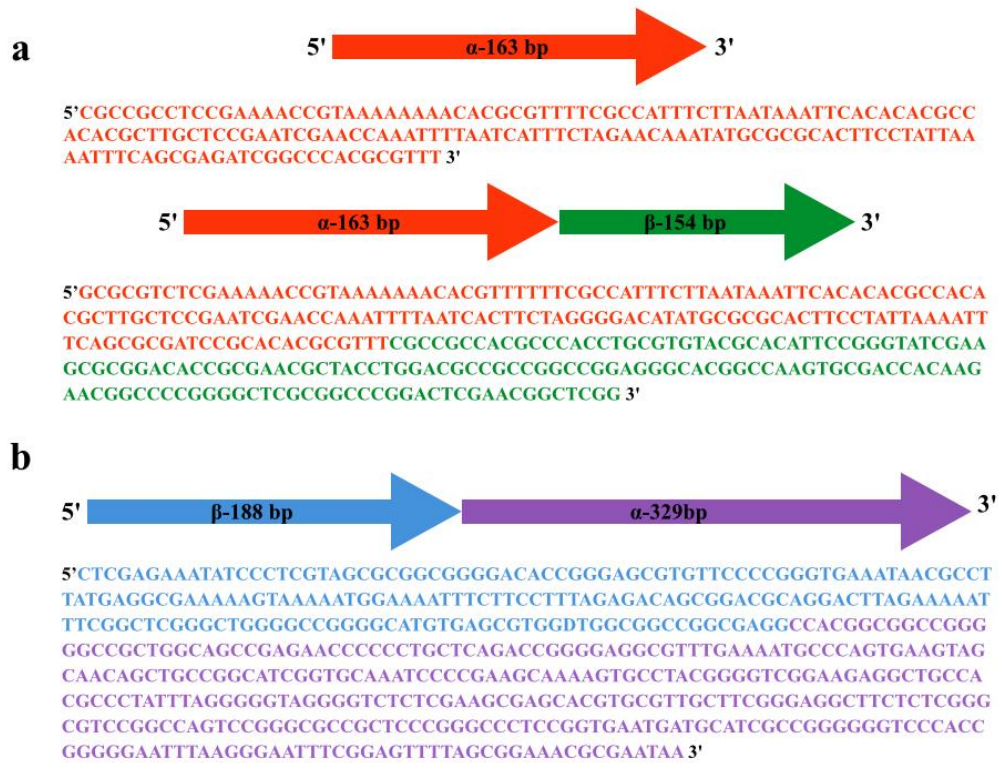

**Supplementary Figure S2** includes a NJ tree showing the sequence relationship between Esur2 vs Esur34 (a) and Esur3 vs Esur58 (b) satDNAs family extracted from the *E. surinamensis* genome. Repeats belonging to the structurally complete copies of each satDNAs family are shown in colors. In the tree, the labels of structurally complete copies correspond to the cluster number (e.g., CL2=Esur2) followed by the contig and copy number (e.g., ctg6-2) representing the repeat analyzed. The nucleotide divergence between each relationship is indicated in the figure. The tree was estimated using the NJ algorithm and the *p*-distance substitution method.

●Esur2 vs ●Esur34

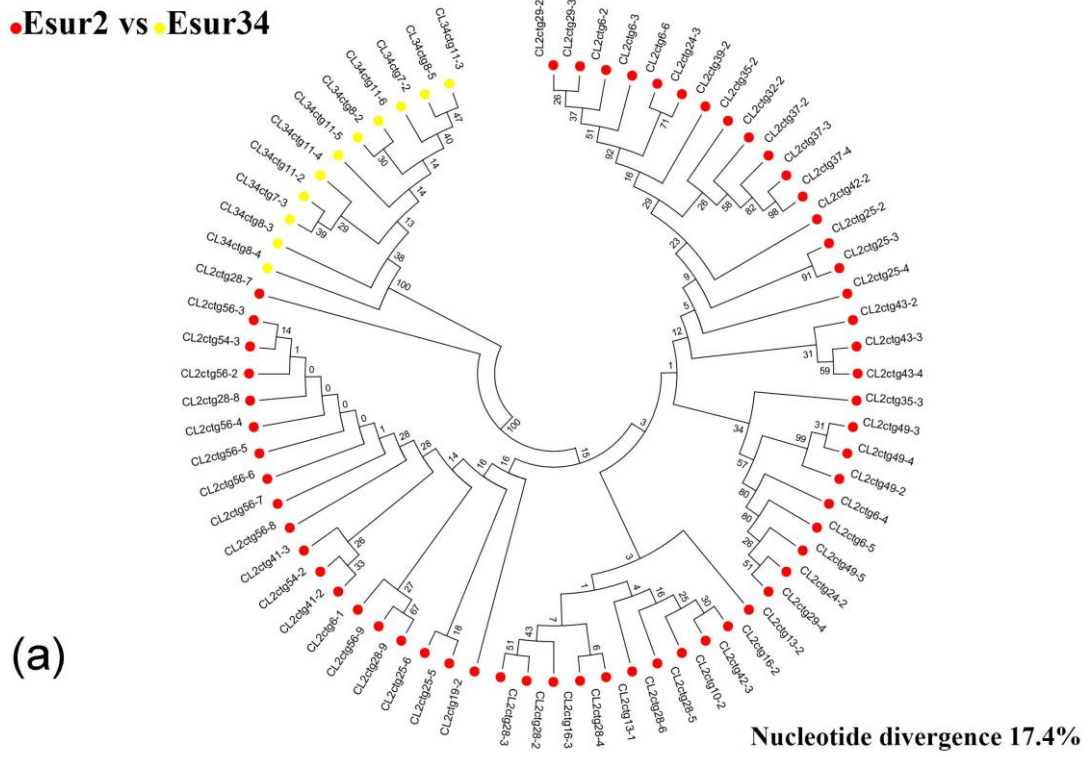

(a)

●Esur3 vs ●Esur58

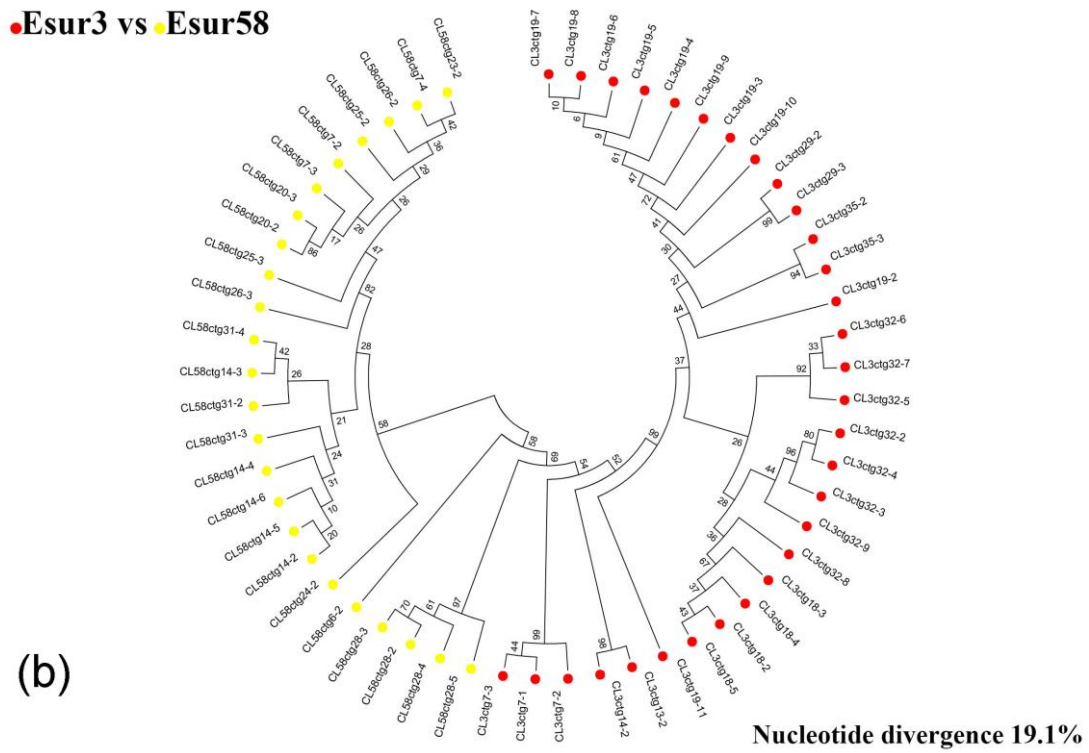

(b)

**Supplementary Figure S3.** Plotting showing the negative correlation between (a) monomer size vs nucleotide divergence, and between (b) monomer size vs the total countable loci number of satDNAs. Note in (a) that as the monomer size increases the nucleotide divergence tends to decrease, and in (b) that smaller satDNAs tend to be more scattered than the larger one.

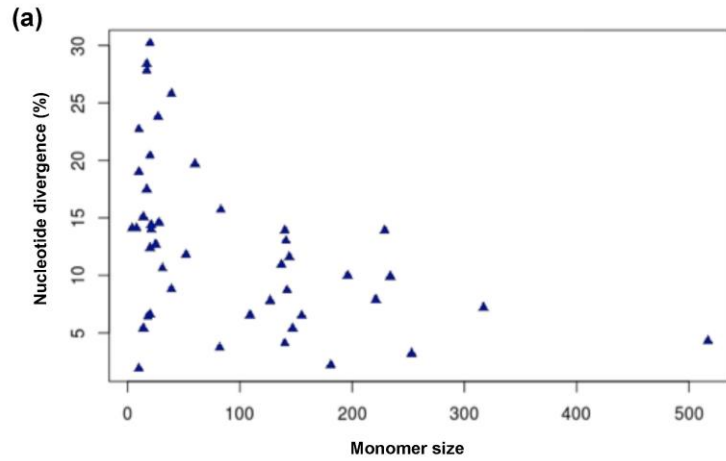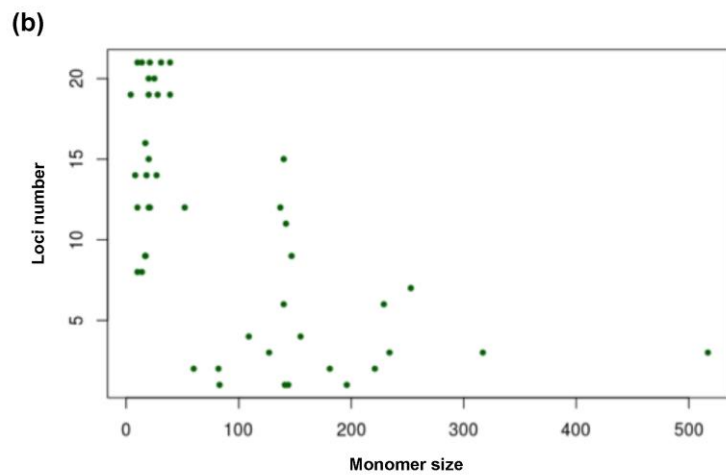

**Supplementary Figure S4** shows the Two-color Fiber-FISH for satDNAs exclusively located in chromosome 1, showing the interspersion of Esur4, Esur6 and Esur18- $\beta$ .

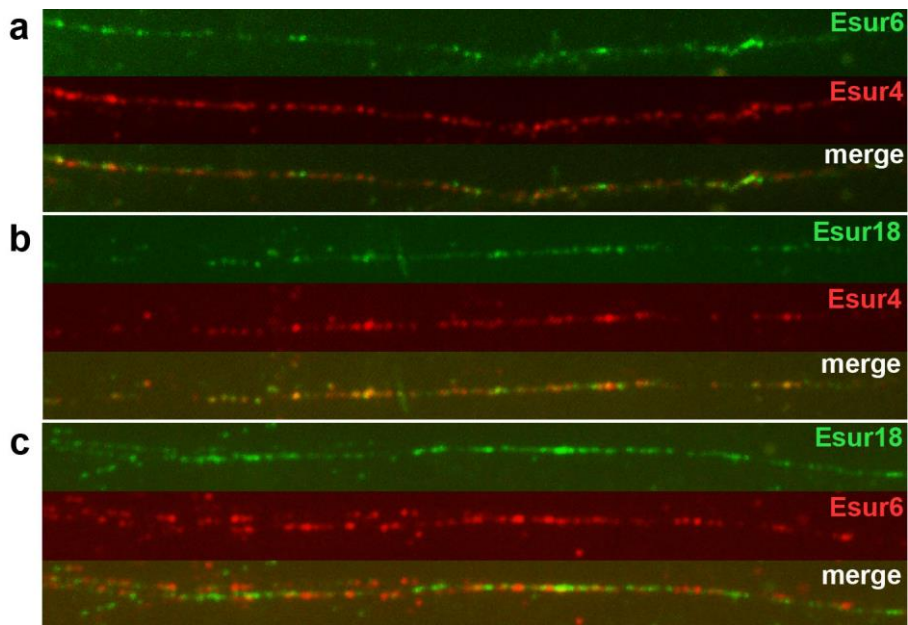

**Supplementary Figure S4** FISH on mitotic chromosomes of male embryos showing the location of Esur17- $\alpha/\beta$  and Esur18- $\alpha/\beta$  satDNAs. Note the identical location for Esur17- $\alpha$  and Esur17- $\beta$  and the differential location for Esur18- $\alpha$  and Esur18- $\beta$ , with the occurrence of Esur18- $\alpha$  in the neo-Y chromosome.

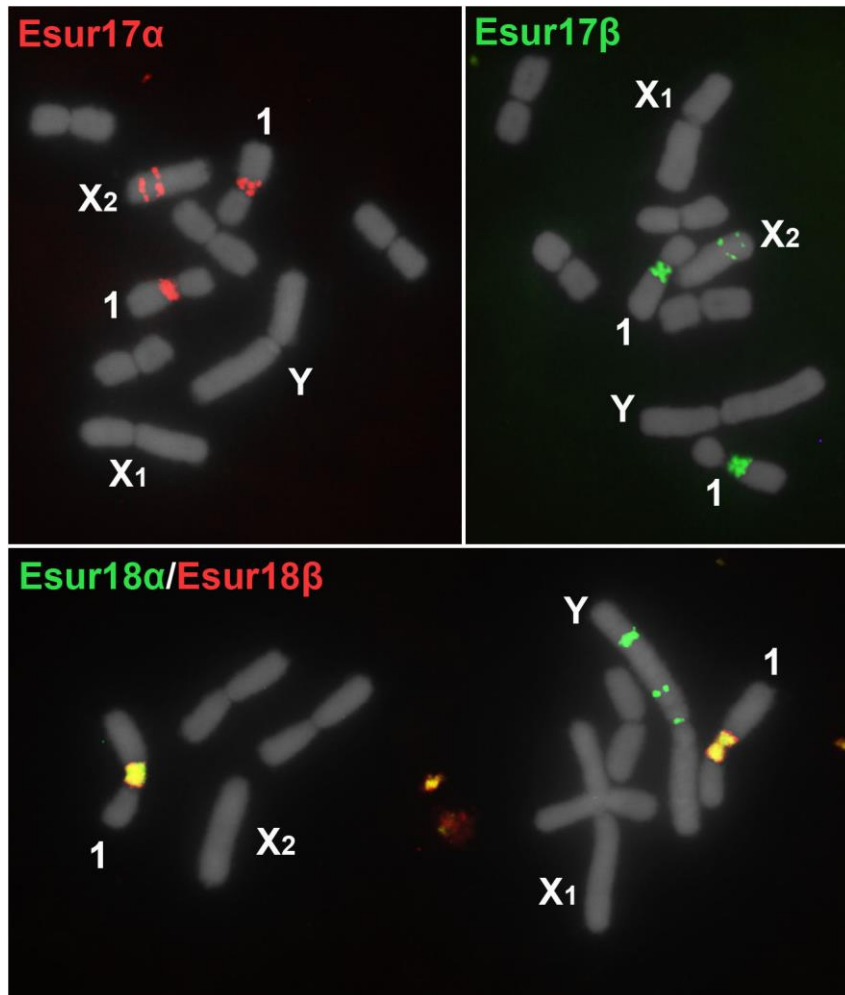



**Supplementary results S1.** contains monomer consensus sequences recovered from the *E. surinamensis* genome

**satDNAs monomer consensus < 60 bp**

>Esur1  
TGGAGGAGGA

>Esur5  
TCTCGAGACGGGGGCGACGC

>Esur12  
GGGACGAGAC

>Esur13  
TTGAGACAGGCTTCCGAGAGACACC

>Esur16  
GAAGAACTGCGAAGAGATAC

>Esur21  
CCCTCAAGCCGTCGCAACGTCCACCTCTCAC

>Esur25  
GGCA

>Esur30  
GGGAGGAGACGCGGGCGCGC

>Esur40  
ACTACGCATGGGAGTACACCTGCGGGCAGCGGCTCACTC

>Esur49  
CTCCACCTCCTTACTCCGCCTACTACCG

>Esur56  
GAGTAAAGGGAA GAAGAGGTG

>Esur68  
TAGGCAGG

>Esur70  
TTGGGTATTGCACGTGGCAGATAATCACATAGCAAA

>Esur76  
GGTTAGGTTTTAGGGTA

>Esur79  
GAGGAGACGG

>Esur91  
CGGCGAGGACATCACAACGCC

>Esur92  
GCCCCGTGCGCCCAAAGGCAT

>Esur113  
CACGCGTGTGGACGGAGA

>Esur114  
GGAGAGGTGGAGGC

>Esur115  
AAAGAGAAGAGGGCGGA

>Esur124  
GACGGAGACGGGGAGACGACGGCGCGG

>Esur127  
TTTTAGGGTAGGTTAGG

>Esur130  
GACGGAGAGATGTA

>Esur131  
GGCGACAGGGGAAACGGCTTCGAGAGACGACGCGGTGGACACAGTGGCGA  
GA

**satDNAs monomer consensus > 60 bp**

>Esur2\_137bp  
CGGGGCAGAGAGCGTCGGCGCCGGGAGCAGGGAGGAGTGAGTAGGGCGCG  
CGGGGCGGGACGGGGCGGCGCAGGAATGCGCAACAAACACCACTGTATGA  
AGGAGGGCGAGAGGCTGTCGCCTGGCCAAAGGCGCAG

>Esur3\_142bp  
CTCGACAGCCCATTTCCATTCTCCTTATGATGGTGCAGGGCGGGCCACAGTG  
CGCTGCCCCCTCCTGCCCCCGCACGCCGCTATCACTAATTTCCCTGCTCCCG  
GTGCCGGCGCACCCCGCCCCGTTGCGCCGACTGGACA

>Esur4\_144bp  
GGCCGGTAGTGGC AAAAAGGCGGTGAAATGGAGTAACCGCGAGCGCCGGG  
CGCCAATCTGAAGGTGGCACTGAGGCCCGGGGACGCGCAGAGGCTTATACC  
TCTGCGGGCCCCGGGCCACGGATGCCGGCTAACGTTGAAACGTT

>Esur6\_83bp  
CGCTAAAACATCGCAACCCCAACGGCCCCCGCATACGAAAAGATCGCCGAG  
AAACCAGCCCAAGGCGAGGCCGACGGCCGCCT

>Esur11\_147bp

CTTCTCTAAGGAGGCCAGGTGCCATCCCGGACGCCGTCGACGGGCAAATGT  
TGCCGCCTAGGGGTGGTTGGCGTCACCACACTTCCCTACTGCGGGCGTCAGAA  
GAAGCATTCAATTGGTTGCGGCGACGGGGGATACGGAGTCGGATG

>Esur17 $\alpha$ \_163bp

CGCCGCCTCCGAAAACCGTAAAAAAAACACGCGTTTTTCGCCATTTCTTAATA  
AATTCACACACGCCACACGCTTGCTCCGAATCGAACCAAATTTTAATCATT  
CTAGAACAATATGCGCGCACTTCTATTAAAATTTTCAGCGAGATCGGCC  
ACGCGTTT

Esur17 $\alpha$ / $\beta$ \_317

GCGCGTCTCGAAAACCGTAAAAAAAACACGTTTTTTTCGCCATTTCTTAATAA  
ATTCACACACGCCACACGCTTGCTCCGAATCGAACCAAATTTTAATCACTTC  
TAGGGGACATATGCGCGCACTTCTATTAAAATTTTCAGCGCGATCCGCACAC  
GCGTTTTCGCCGCCACGCCACCTGCGTGTACGCACATTCCGGGTATCGAAGC  
GCGGACACCGCGAACGCTACCTGGACGCCGCCGGCCGGAGGGCACGGCCA  
AGTGCGACCACAAGAACGGCCCCGGGGCTCGCGGCCCGGACTCGAACGGCT  
CGG

Esur18 $\alpha$ / $\beta$ \_517bp

CTCGAGAAATATCCCTCGTAGCGCGGGCGGGGACACCGGGAGCGTGTTCCCC  
GGGTGAAATAACGCCTTATGAGGCGAAAAAGTAAAAATGGAAAATTTCTTC  
CTTTAGAGACAGCGGACGCAGGACTTAGAAAAATTTTCGGCTCGGGCTGGGG  
CCGGGGCATGTGAGCGTGGDTGGCGGCCGGCGAGGCCACGGCGGGCCGGGG  
GCCGCTGGCAGCCGAGAACCCCCCTGCTCAGACCGGGGAGGCGTTTGAAA  
TGCCCAGTGAAGTAGCAACAGCTGCCGGCATCGGTGCAAATCCCCGAAGCA  
AAAGTGCCTACGGGGTCGGAAGAGGCTGCCACGCCCTATTTAGGGGGTAGG  
GGTCTCTCGAAGCGAGCACGTGCGTTGCTTCGGGAGGCTTCTCTCGGGCGTC  
CGGCCAGTCCGGGGCGCCGCTCCCGGGCCCTCCGGTGAATGATGCATCGCCG  
GGGGGTCCCACCGGGGGAATTTAAGGGAATTTTCGGAGTTTTAGCGGAAACG  
CGAATAA

>Esur24\_140bp

GTTTGAAAATCATGGAACAATACAAAGTATAAACCCAGCACGTAACCTCAAC  
GTAAATCAAATCATACGAAGTAAACAGTTAGGCCTAAAATACACACACAAG  
CACTGATCACAATATCAGCTGTAAAGTAACCTACATAT

>Esur31\_229bp

CCACGCTGGCTGCAAGGGTACCTGTGCAAACCGGGGAAGCGAAAAAAAAT  
GCCCAGTGAAGTAAGCACGAAACCCGGTGTCTGCACAGATTGAAGGTGAAA  
AAATGCATTCGGGGCCCGAAGAGGCTGCCACGCCCTATTTAGGGGGGACCA  
CCCTGCCGATATAGGAATAATAATATATATAGGTATGGACCGGCAGGGCC  
TCCTCGGCCGAGAAAAGCGTTTGGCT

>Esur34\_140bp

GCAGAGGGTGTCCGCACCGGGAGCAGGGAGAAGGAGTGAGTTGGGCGCGC  
GGGGCGGGAAGGGGCGGCGCAGGTATGCGCAACATACCCACTGTATGAA  
AGAAGGCGAGGGGCTGTCGCATGGCAAAGGCGTAGCGAG

>Esur37\_234bp

CAGAGCGGCACGGTGGGCGATGCGGCGTTCGCGTGCGGTTGGCAGGACTGC  
GCGCCGCCCTTCAAGTCGTCGCTGCGCCTCGTGGTGATGCGCGCGCAGAAG  
CCGTCGCGCGTGACTGCGCTCGGCTTCGCCACGCTGTCGCTGCCGCTCTTCG  
CCGCGGTGAGTGATCACTCGTCTCCACCACTCACTCCTCACGGGGTGACATA  
GCAACTAAAAAACCCCGATGCGCGTGCA

>Esur46\_281bp

CGCACTCCTCGCGATCAGTGCGCGACGCCAGTGACTGGCCATTGACGCGAC  
TACCCCGCGAACGGCAGCGTAGTTCGCTTGTGAGTTGCATCTCTCACACGGA  
GAGATTGCTGGTTCGAACCGAACGCGACGCGGTGCTCCCCCTCCCGCTTCGC  
AGGAAGGAAGTGCGGATCCGCAAACGC

>Esur58\_141bp

CTATGGCCCGCCCTGCACCAGCATAAGGAGGATGGAAAGGGGCCTTCGAGT  
GTCCAGGCGGCGCAACGGGGCGAGGAGCGCCGGCGCCGGGAGCAGAGAAA  
TGACCGAATGCGGGCGTGCTGGGGCGGGAGGGGGCAGCGCA

>Esur65\_155

AGTGATTTCAAGTGTTTTCAAGTGCTCAAGCAGCAGTCCACCTCGCCGCAGC  
GCTCAACCGCTCAGATAGCCAGCACGACTACGCTTCCTTCTGTAAGTCTCAG  
TCTAGCTGCAATCTAGCCACCAATGTTATTACTGCAAATGCATTTGCTACC

>Esur66\_253bp

GTTGGGGGCGGGCGATGTAGGGGGCGGGCGGCATGAAGGCGCGGGTGGCG  
CGAGGGCGCGAGGGTGCGCCAGCGCGCGGCGCCGATCGCCCGGGACAAA  
CGTGGCGCGGGCTTAGTTAAGAGTACAGGAGAGGAAAACAGGGAGCGGGT  
GGCACGAGGGTGTGGGCGGTAGAAGGGCAAGAACGCTGGAACGGTAAGGG  
CGGTCGAAGGACAAGAAGAGAGCTGTGGAAGAGCAAGGGCGATGTGAGTA  
TGC

>Esur\_60bp

TGGCGGTAGCGATGTCATCGGCTTCGGTGGTGGTGGCGGTGAAGGCAGTAG  
GTCAGGTAA

>Esur82\_109bp

GGATTAATGTGGTGTGAGTGAGGAATAGTAAGTGGCTCCGCTTTGGGTAGG  
GATGATGGGTGGCGGACTGCGCTCTATGAGCGCTCTCCGGCTGGGAGAGA  
TGAGAGG

>Esur87\_82bp

GCCCCGGGCTTCCAGCATTAGGTGAGTCAGCAGCGCTCCGACTGTA ACTCTT  
CCGTCGGATAAGATGCGCTCAGCGCCTGTG

>Esur88\_127bp

TTGTGGTGGTGGTGGTTGCGAGAGCGCTGGAGGAGGAGGAGGATCAGCTGT  
CGTGTGGTGGAGAGTATGGTGTGATAACGCTGAGAGGGTGCAGGTGTTGT  
CGTGGATGTCTAACGGCAGTGGTGA

>Esur96\_196bp

GCAGCGCCGCGGGCGCGCAGGGGCTCACTGGTCCTTGCGCTGGCGGAGGGCG  
TGGCGTGTGAGGGGGCGAGGGCATAGCGGCGGGCGAGGCGCCAGAGGAAG  
CGGGCGGGCGCAGGAGGCGAGGAGGGCGGGCCGCCAGCGCCGCCAGCAG  
CGCCGCCGCCACGTCCCAGCAGCAGCAGCTCGTACCACGCCAGGC

>Esur128\_221bp

GGCATTTCACTATCTGCAACCAATCTACTGAAAACCTTGCCAATACCAAGAGT  
CCTGTTCACGATCTTTCAGAAGCGACGTCACTTAATAGGAATGTGCGACGCT  
CGAGAGGAGGTAGAGAGAGGGCGAAGGTCGGAAGAAGACAAGCGCCATCGG  
CCGTCTCACAGCGAGGACACAGTGGTGAGAGCAGTGA CT CAGAGGATAAC  
GGAGTAAGTTAAG
